# Supplementary material for: Combining a GSI and BCL-2 inhibitor to overcome melanoma's resistance to current treatments
Source: PubMed Central journal article supplement (PMC5356684; doi:10.18632/oncotarget.13141), 2016-11-05
Supplement: oncotarget-07-84594-s001.pdf [file oncotarget-07-84594-s001.pdf]

## Combining a GSI and BCL-2 inhibitor to overcome melanoma's resistance to current treatments

### Supplementary Materials

**Supplementary Table S1: Melanoma patient sample information**

| Sample ID | Mutation status            | Treatments before sample collection (Length of treatment)                                                | Histopathological features | Sample site          | Duration between treatment and relapse/sample collection |
|-----------|----------------------------|----------------------------------------------------------------------------------------------------------|----------------------------|----------------------|----------------------------------------------------------|
| MB1823    | BRAF V600K                 | BRAF inhibitor (1 year 8 months)                                                                         | Nodular                    | Small Bowel          | 2.5 months                                               |
| MB2195    | BRAF V600E                 | None                                                                                                     | Superficially spreading    | Brain                | Not applicable                                           |
| MB2309    | BRAF V600E                 | BRAF-MEK inhibitor combination 1 (1 year 5 months)<br>Different BRAF-MEK inhibitor combination (1 month) | Superficially spreading    | Distant Subcutaneous | < 1 month                                                |
| MB1374    | Triple WT*                 | Chemo-Abraxane (< 1 month)                                                                               | Unknown Primary            | Distant lymph node   | During treatment                                         |
| MB2046    | Triple WT*                 | Surgery                                                                                                  | Superficially spreading    | Subcutaneous         | 1 yr. 4 months                                           |
| MB1692    | Triple WT*                 | Surgery                                                                                                  | Superficially spreading    | Subcutaneous         | Not known                                                |
| MB2141    | Triple WT                  | Immunotherapy ( 4 doses)                                                                                 | Mucosal                    | Distant Subcutaneous | 8 months                                                 |
| MB1920    | NRAS G12S and PIK2CA E545K | Chemotherapy (8 months),<br>BRAF/MEK inhibitor (4 months),<br>Immunotherapy (9 months)                   | Unknown primary            | Lymph node           | > 3.5 years                                              |
| MB929     | NRAS G13D; BRAF WT         | Immunotherapy, chemotherapy (10 months)<br>small molecule inhibitor (1 month)                            | Superficially spreading    | Subcutaneous         | 1 month                                                  |

Note: Triple WT\*= Wild type for BRAF, NRAS and NF-1.

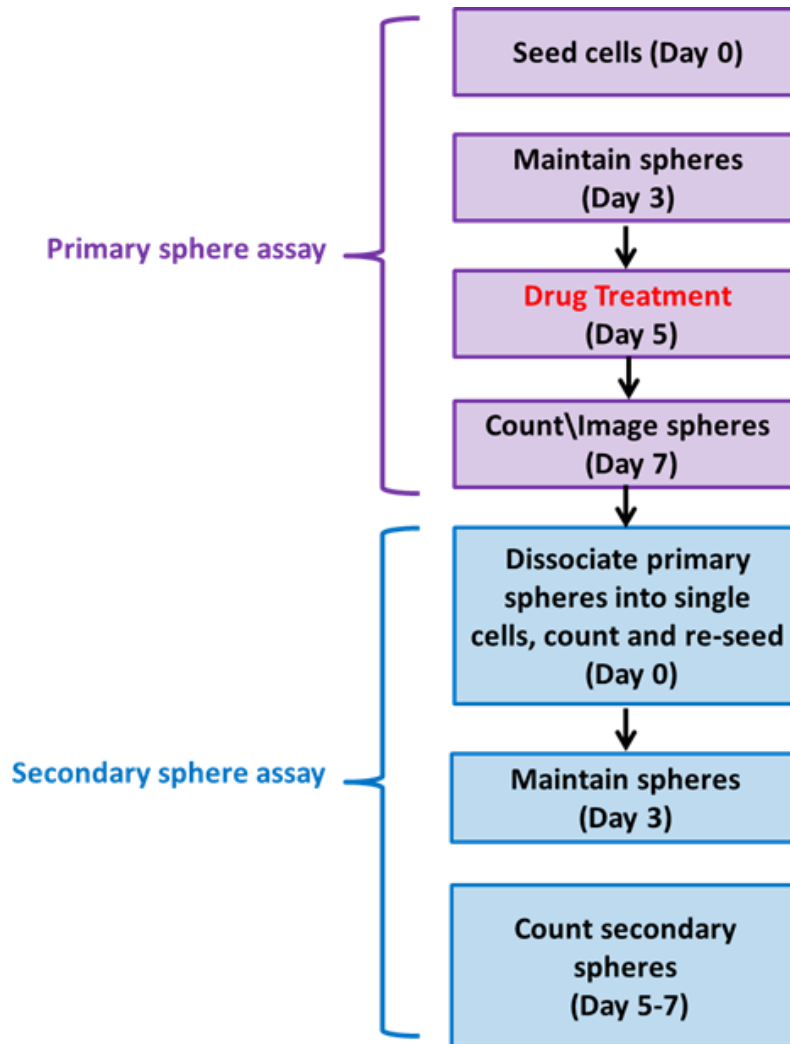

Supplementary Figure S1: Schematics of Primary and Secondary sphere assay.

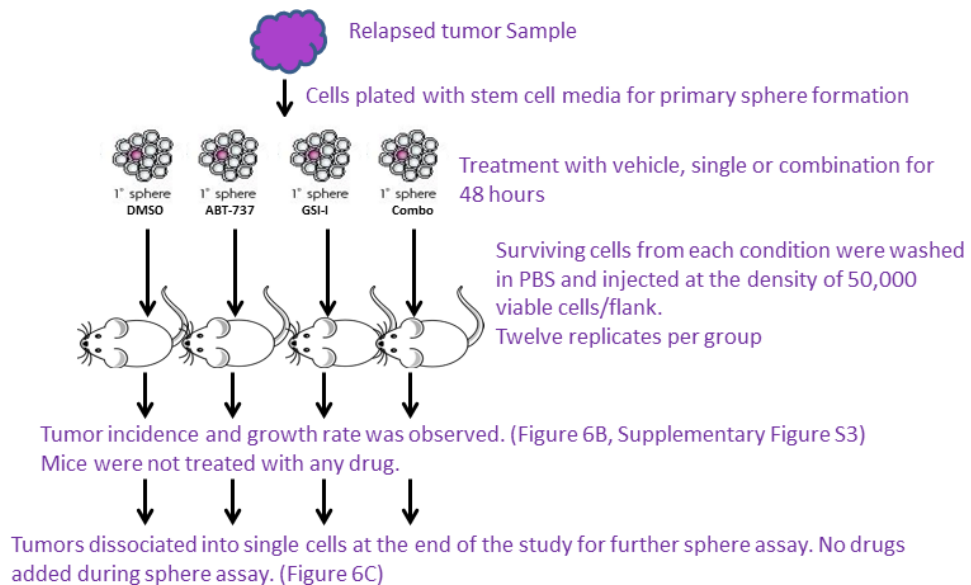

Supplementary Figure S2: Schematic diagram of the MIC mediated mouse xenograft study.

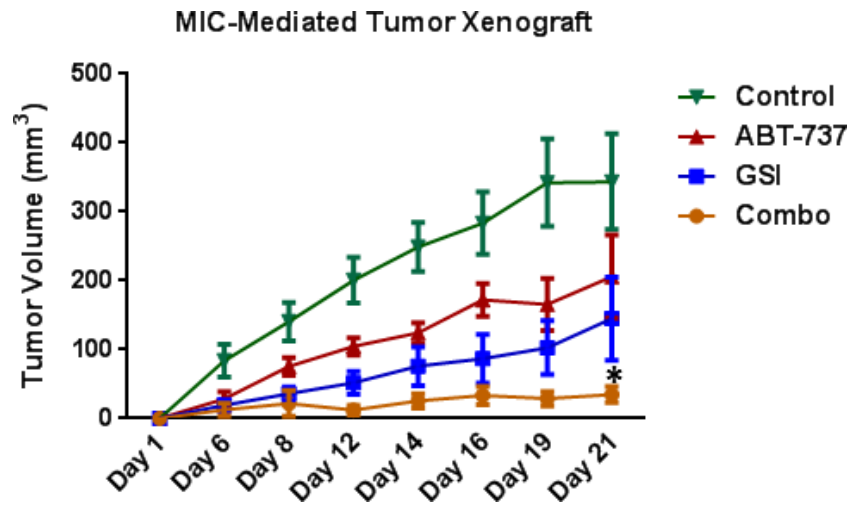

**Supplementary Figure S3: Relative tumor volumes in a MIC-mediated mouse xenograft model.** The tumor volume at day 0 was set as 100%. The \* indicates that the combination significantly delayed the tumor growth compared to Control, ABT-737 and GSI-I on day 21 ( $p < 0.05$ ).

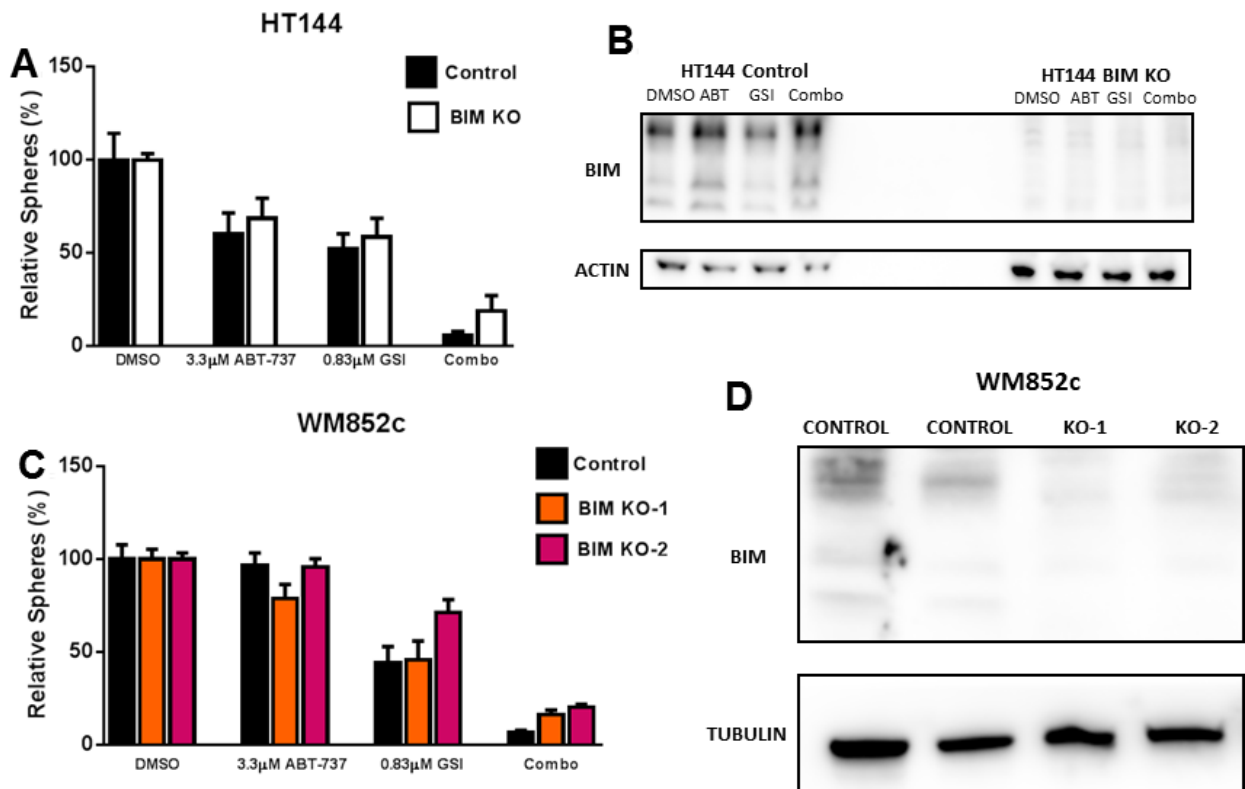

**Supplementary Figure S4: HT144 and WM852c melanoma cell lines with BIM knockout (KO) were generated with the CRISPR/Cas9 technology and these cells were used for sphere assays.** (A) and (C) show the quantified sphere assays data with the KO clones of HT144 and WM852c after indicated drug treatments for 48 hours. (B) and (D) shows immunoblot to confirm KO.

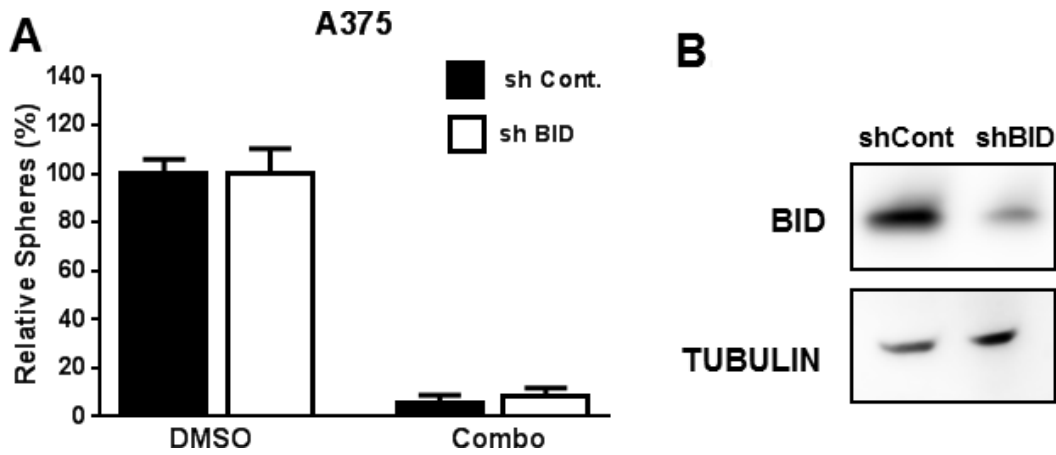

Supplementary Figure S5: (A) Primary sphere assays of A375 melanoma cells, carrying a control shRNA (shcontrol) or an shRNA against BID (sh BID). Cells were treated for 48 hours in sphere conditions with the following treatments: vehicle (DMSO), or combination of the ABT-737 and GSI-I drugs. (B) Immunoblot confirmed the knockdown of BID.

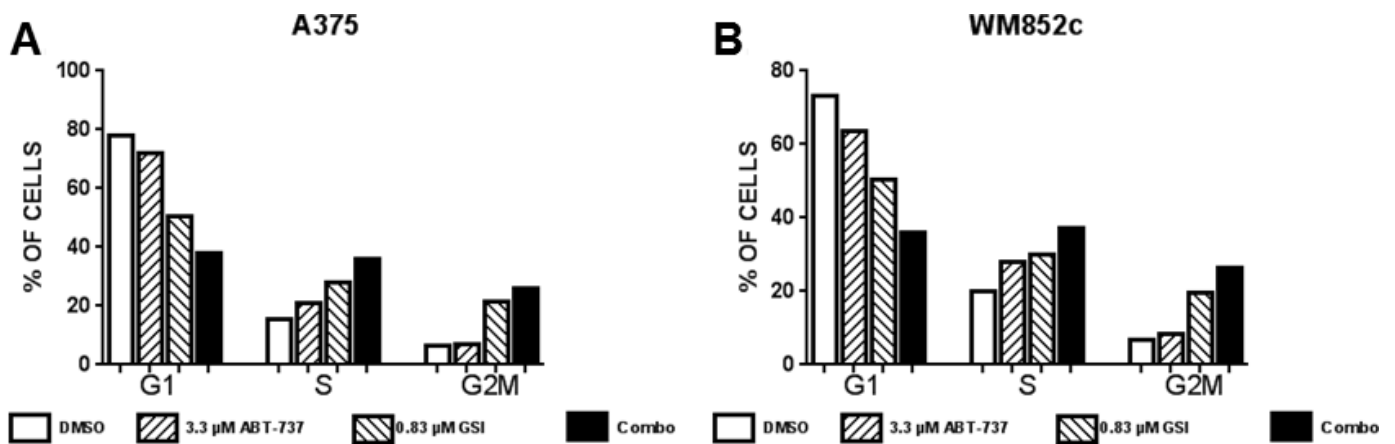

Supplementary Figure S6: Cell cycle analyses was performed in (A) A375 and (B) WM852c melanoma cell lines using Krishan stain and the data was analyzed by Flow cytometry using ModFit software.

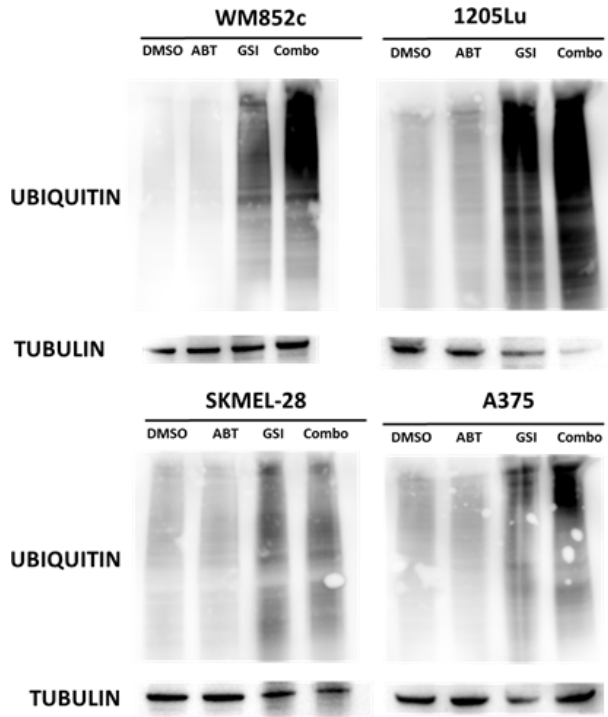

**Supplementary Figure S7: GSI-I and the combo increased the expression of polyubiquitinated proteins.** Protein lysates were prepared after treating the spheres with DMSO, single drug or combination for 24 hours. Blots were probed for UBIQUITIN and TUBULIN.

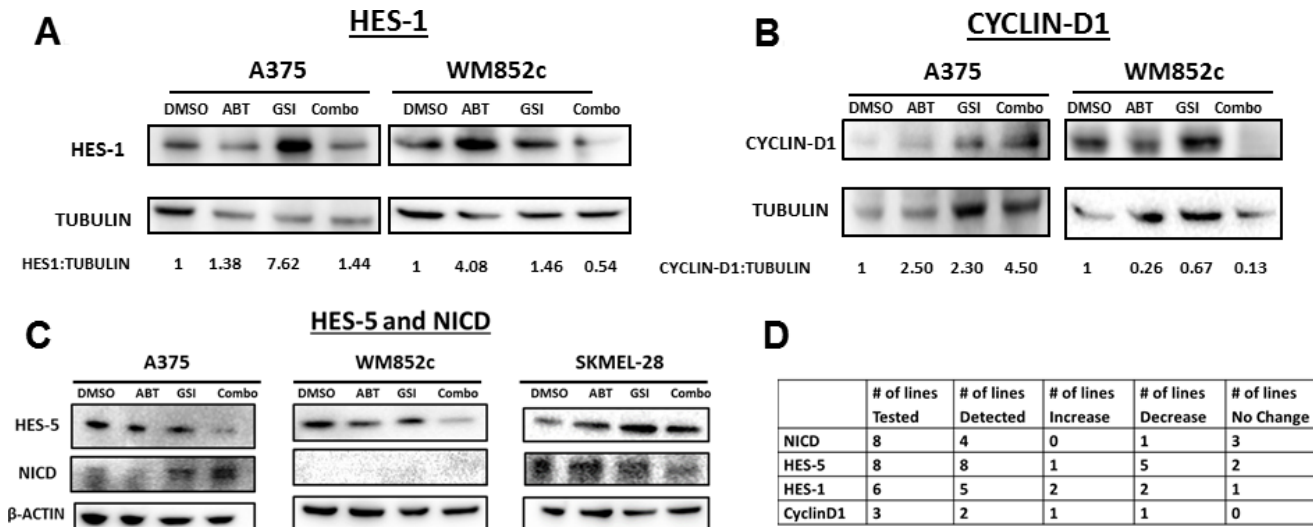

**Supplementary Figure S8: Protein lysates were prepared after 48 hours of treatment in sphere conditions and were tested for Notch downstream targets (A) HES-1. (B) CYCLIN-D1 (C) HES-5 and NICD. (D) Summary of Notch downstream protein response after GSI-I and ABT-737 combination treatment. The numbers indicate the number of cell lines which we tested, detected expression of indicated proteins, and found changes (increase, decrease or no change) in response to combination treatment.**
